# Supplementary material for: Incidence and Relative Risk of COVID-19 in Adolescents and Youth Compared With Older Adults in 19 US States, Fall 2020
Source: PubMed Central journal article supplement (PMC9287748; doi:10.1001/jamanetworkopen.2022.22126), 2022-07-15
Supplement: jamanetwopen-e2222126-s001.pdf [file jamanetwopen-e2222126-s001.pdf]

## Supplemental Online Content

Schneiderman M, Romain B, Kaganovskiy L, Geliebter A. Incidence and relative risk of COVID-19 in adolescents and youth compared with older adults in 19 US states, fall 2020. *JAMA Netw Open.* 2022;5(7):e2222126. doi:10.1001/jamanetworkopen.2022.22126

**eFigure 1.** Proportion of Variants Circulating in the US from April 11, 2021, through April 24, 2021, Based on SARS-CoV-2 Genomes Sequenced During that Time Period

**eAppendix 1.** Case Data by State Websites

**eAppendix 2.** *New York Times* Websites Indicating Surges by State

**eAppendix 3.** List of Supplemental Figures/Tables Containing Case Data

**eAppendix 4.** Demographic Data by Age and by State Websites

This supplemental material has been provided by the authors to give readers additional information about their work.

**eFigure 1. Proportion of Variants Circulating in the US from April 11, 2021, through April 24, 2021, Based on SARS-CoV-2 Genomes Sequenced During that Time Period**

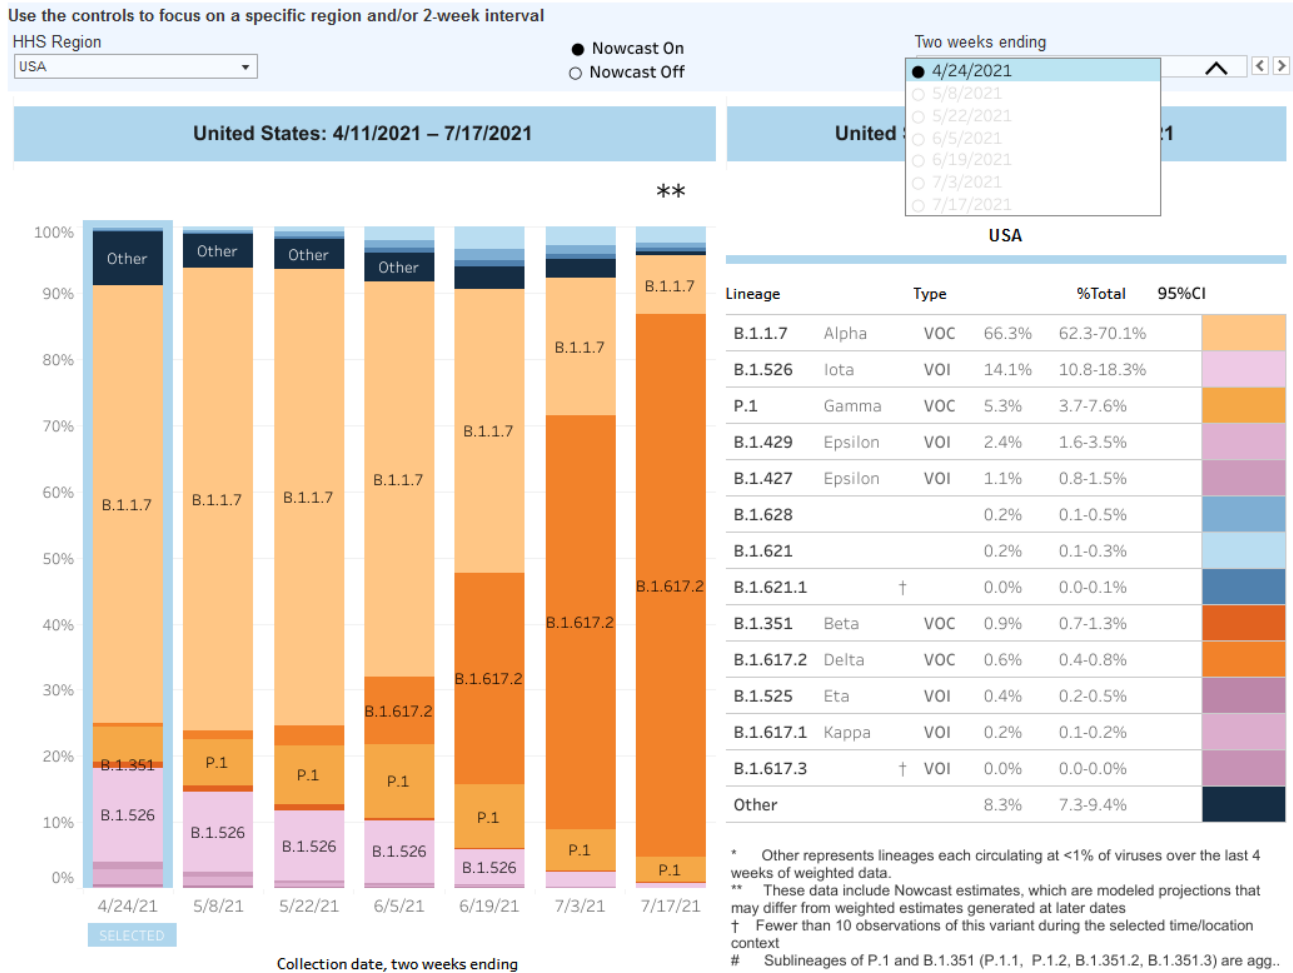

Source: <https://covid.cdc.gov/covid-data-tracker/#variant-proportions>

## eAppendix1. Case Data by State Websites

- (i) Alaska: <https://experience.arcgis.com/experience/2d19dc2b5c7e4b399ff6495a8950493d/> [Retrieved Nov. 1, 2020]
- (ii) Colorado: <https://covid19.colorado.gov/data> [Retrieved Oct. 23, 2020]
- (iii) Michigan: <https://www.mistartmap.info/compare/age-group> [Retrieved Nov. 18, 2020]
- (iv) Montana: <https://dphhs.mt.gov/publichealth/cdepi/diseases/coronavirusmt/demographics> [Retrieved Oct. 24, 2020]
- (v) Nevada: <https://nvhealthresponse.nv.gov> [Retrieved Oct. 31, 2020]
- (vi) New Mexico: <https://cvprovider.nmhealth.org/public-dashboard.html#> [Retrieved Oct. 24, 2020]
- (vii) North Dakota: <https://www.health.nd.gov/diseases-conditions/coronavirus/north-dakota-coronavirus-cases> [Retrieved October 24, 2020]
- (viii) Oregon: <https://public.tableau.com/app/profile/oregon.health.authority.covid.19/viz/OregonCOVID-19CaseDemographicsandDiseaseSeverityStatewide/DemographicData> [Retrieved Oct. 31, 2020]
- (ix) Pennsylvania: <https://experience.arcgis.com/experience/ed2def13f9b045eda9f7d22dbc9b500e> [Retrieved Oct. 31, 2020]
- (x) South Carolina: <https://scdhec.gov/covid19/south-carolina-county-level-data-covid-19> [Retrieved May 15, 2021]
- (xi) South Dakota: <https://doh.sd.gov/news/coronavirus.aspx> [Retrieved Oct. 24, 2020]
- (xii) Tennessee: <https://www.tn.gov/content/tn/health/cedep/ncov/data.html> [Retrieved Nov. 12, 2020]
- (xiii) Wisconsin: <https://www.dhs.wisconsin.gov/covid-19/cases.htm#by%20age> [Retrieved Oct. 24, 2020]
- (xiv) Alabama: <https://bamatracker.com/chart/caseages> [Retrieved Nov. 14, 2020]
- (xv) Florida: <https://floridahealthcovid19.gov/> [Retrieved November 13, 2020]
- (xvi) Oklahoma: [https://coronavirus.health.ok.gov/sites/g/files/gmc786/f/2020.10.23\\_weekly\\_epi\\_report.pdf](https://coronavirus.health.ok.gov/sites/g/files/gmc786/f/2020.10.23_weekly_epi_report.pdf) [Retrieved Oct. 23, 2020]
- (xvii) Rhode Island: <https://ri-department-of-health-covid-19-case-data-rihealth.hub.arcgis.com/#age> [Retrieved October 25, 2020]
- (xviii) Minnesota: <https://www.health.state.mn.us/diseases/coronavirus/situation.html#ageg1> [Retrieved Oct. 24, 2020]
- (xix) Missouri: <https://health.mo.gov/living/healthcondiseases/communicable/novel-coronavirus/data/public-health/demographics.php> [Retrieved Oct. 24, 2020]

Since the data on the websites above are updated on a daily basis, we are including below, in the Supplemental Tables/Figures, the data as they appeared on the websites when we accessed them. These provide the numbers we used in our calculations.

**eAppendix 2. New York Times Websites Indicating Surges by State**

<https://www.nytimes.com/interactive/2021/us/alaska-covid-cases.html>  
<https://www.nytimes.com/interactive/2021/us/colorado-covid-cases.html>  
<https://www.nytimes.com/interactive/2021/us/michigan-covid-cases.html>  
<https://www.nytimes.com/interactive/2021/us/montana-covid-cases.html>  
<https://www.nytimes.com/interactive/2021/us/nevada-covid-cases.html>  
<https://www.nytimes.com/interactive/2021/us/new-mexico-covid-cases.html>  
<https://www.nytimes.com/interactive/2021/us/north-dakota-covid-cases.html>  
<https://www.nytimes.com/interactive/2021/us/oregon-covid-cases.html>  
<https://www.nytimes.com/interactive/2021/us/pennsylvania-covid-cases.html>  
<https://www.nytimes.com/interactive/2021/us/south-carolina-covid-cases.html>  
<https://www.nytimes.com/interactive/2020/us/south-dakota-coronavirus-cases.html>  
<https://www.nytimes.com/interactive/2020/us/tennessee-coronavirus-cases.html>  
<https://www.nytimes.com/interactive/2021/us/wisconsin-covid-cases.html>  
<https://www.nytimes.com/interactive/2021/us/alabama-covid-cases.html>  
<https://www.nytimes.com/interactive/2020/us/florida-coronavirus-cases.html>  
<https://www.nytimes.com/interactive/2021/us/oklahoma-covid-cases.html>  
<https://www.nytimes.com/interactive/2021/us/rhode-island-covid-cases.html>  
<https://www.nytimes.com/interactive/2021/us/minnesota-covid-cases.html>  
<https://www.nytimes.com/interactive/2020/us/missouri-coronavirus-cases.html>

### **eAppendix 3.** List of Supplemental Figures/Tables Containing Case Data

- 1) eFigure A. Alaska COVID-19 Cases by Age (as of October 31, 2020)
- 2) eTable B. Colorado COVID-19 Cases by Age (as of Oct. 22, 2020)
- 3) eFigure C. Michigan COVID-19 Cases by Age (as of Nov. 17, 2020)
- 4) eTable D. Montana COVID-19 Cases by Age (as of Oct. 23, 2020)
- 5) eFigure E. Nevada COVID-19 Cases by Age (as of October 30, 2020)
- 6) eTable F. New Mexico COVID-19 Cases by Age (as of Oct. 23, 2020)
- 7) eTable G. North Dakota COVID-19 Cases by Age (as of October 23, 2020)
- 8) eTable/Figure H. Oregon COVID-19 Cases by Age (as of October 30, 2020)
- 9) eFigure I. Pennsylvania COVID-19 Cases by Age (as of October 30, 2020)
- 10) eFigure J. South Carolina COVID-19 Cases by Age (as of Dec. 5, 2020)
- 11) eFigure K. South Dakota COVID-19 Cases by Age (as of Oct. 23, 2020)
- 12) eTable L. Tennessee COVID-19 Cases by Age (as of November 11, 2020)
- 13) eFigure M. Wisconsin COVID-19 Cases by Age (as of Oct. 23, 2020)
- 14) eTable/Figure N. Alabama COVID-19 Cases by Age (as of November 13, 2020)
- 15) eTable/Figure O. Florida COVID-19 Cases by Age (through November 12, 2020)
- 16) eTable/Figure P. Oklahoma COVID-19 Cases by Age (as of October 22, 2020)
- 17) eTable Q. Rhode Island COVID-19 Cases by Age (as of October 24, 2020)
- 18) eTable R. Minnesota COVID-19 Cases by Age (as of Oct. 23, 2020)
- 19) eTable S. Missouri COVID-19 Cases by Age (as of Oct. 23, 2020)

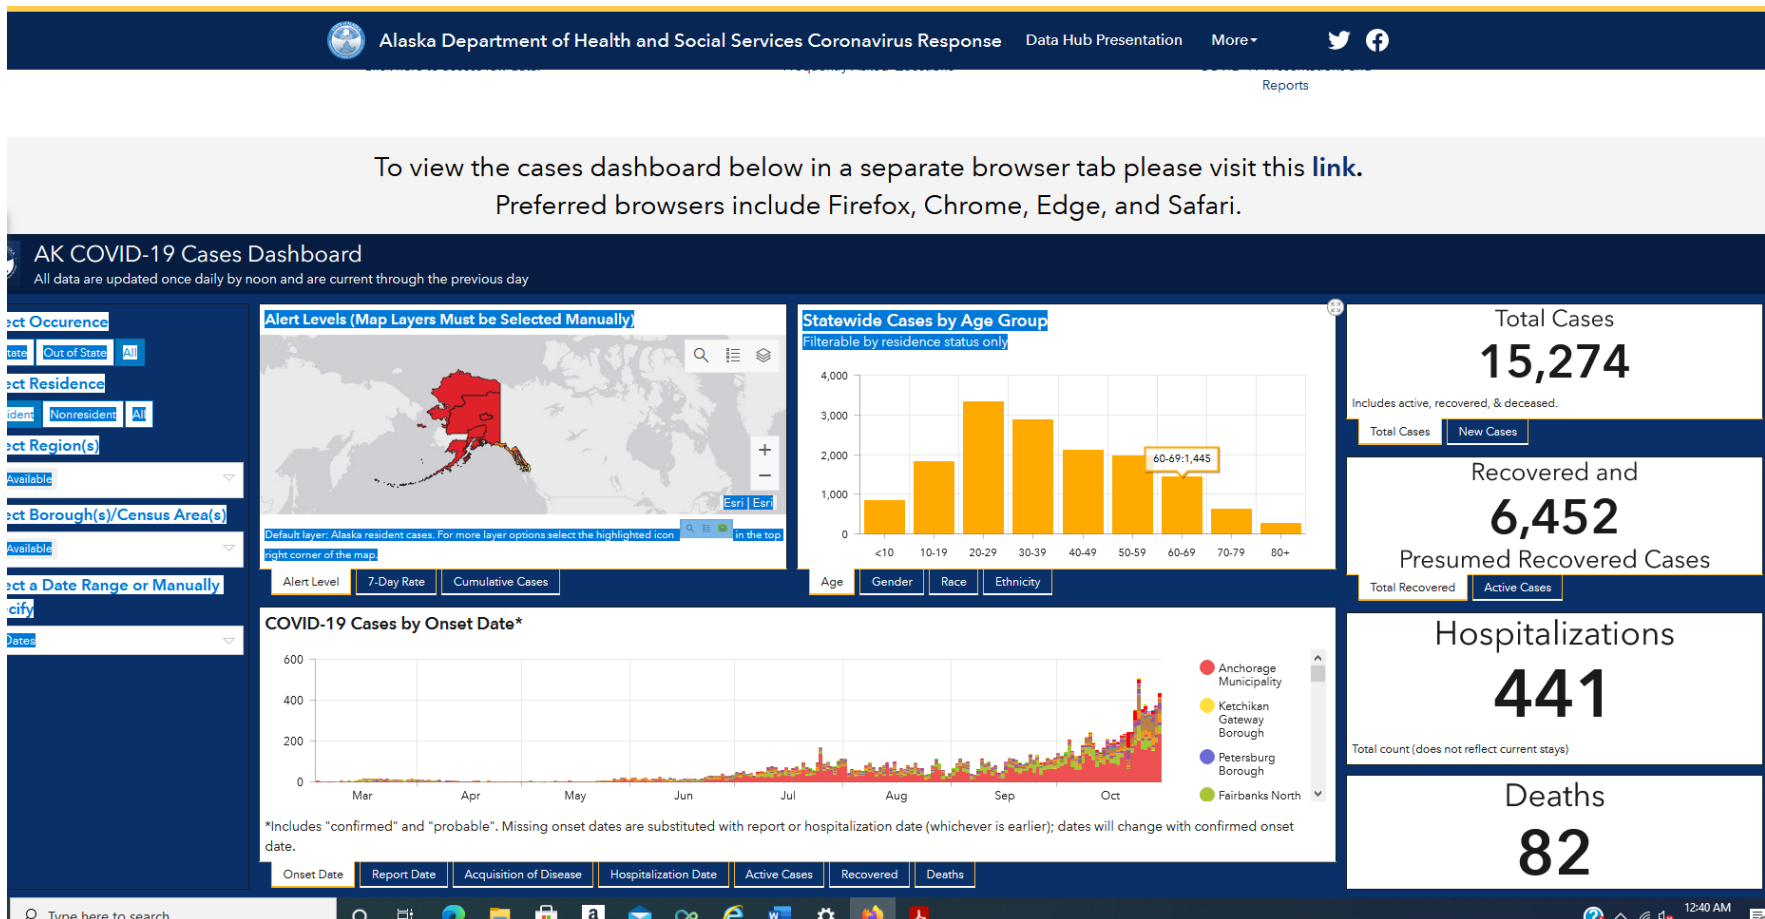

**eFigure A. Alaska COVID-19 Cases by Age (as of October 31, 2020)**

Source: Alaska Department of Health and Social Services Coronavirus Response Hub, AK COVID-19 Cases Dashboard <https://experience.arcgis.com/experience/2d19dc2b5c7e4b399ff6495a8950493d/>

**eTable B. Colorado COVID-19 Cases by Age (as of Oct. 22, 2020)**

| Age   | Proportion of Cases | Total Case Count |
|-------|---------------------|------------------|
| 0-9   | 0.038               | 3480             |
| 10-19 | 0.108               | 9890             |
| 20-29 | 0.223               | 20421            |
| 30-39 | 0.175               | 16025            |
| 40-49 | 0.154               | 14102            |
| 50-59 | 0.133               | 12179            |
| 60-69 | 0.085               | 7784             |
| 70-79 | 0.046               | 4212             |
| 80+   | 0.038               | 3480             |

Total cumulative cases: 91,572

Source: Colorado Department of Public Health and Environment, "CDPHE COVID19 State-Level Expanded Case Data" (as of 10/22/2020)

<https://covid19.colorado.gov/data>

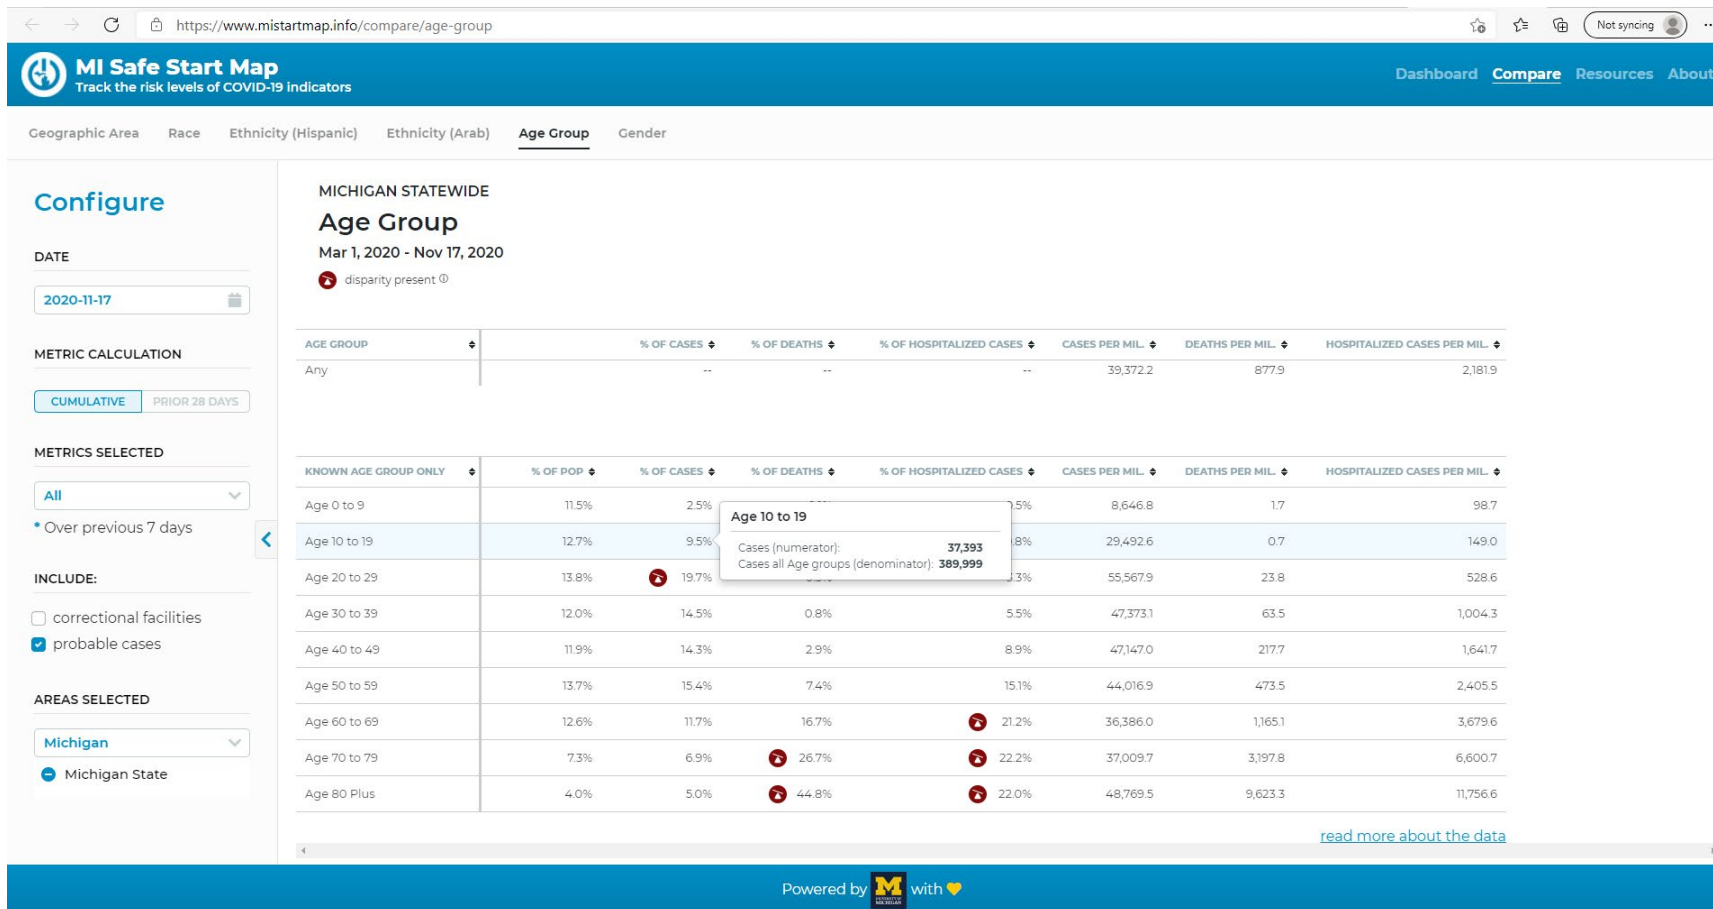

**eFigure C. Michigan COVID-19 Cases by Age (as of Nov. 17, 2020)**

Source: MI Safe Start Map, University of Michigan  
<https://www.mistartmap.info/compare/age-group>



**eTable D. Montana COVID-19 Cases by Age (as of Oct. 23, 2020)**

| <u>Age Group</u> | <u>Number of Cases (percent of total)</u> |
|------------------|-------------------------------------------|
| 0-9 years        | 1,148 (4%)                                |
| 10-19 years      | 3,001 (11%)                               |
| 20-29 years      | 5,452 (21%)                               |
| 30-39 years      | 4,263 (16%)                               |
| 40-49 years      | 3,514 (13%)                               |
| 50-59 years      | 3,457 (13%)                               |
| 60-69 years      | 2,883 (11%)                               |
| 70-79 years      | 1,714 (6%)                                |
| 80-89 years      | 796 (3%)                                  |
| 90-99 years      | 257 (1%)                                  |
| 100+             | 18 (<1%)                                  |
| Total Cases:     | 26,503                                    |

Source: Montana Department of Public Health and Human Services  
<https://dphhs.mt.gov/publichealth/cdepi/diseases/coronavirusmt/demographics>

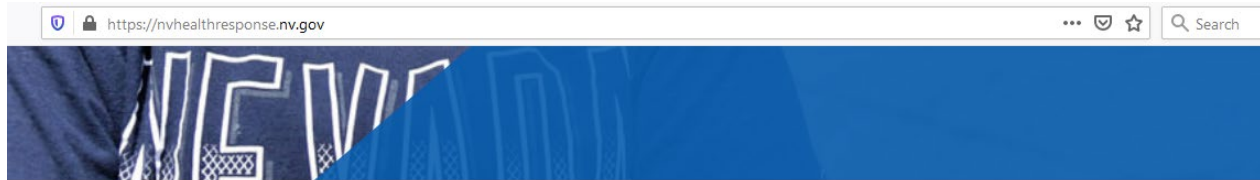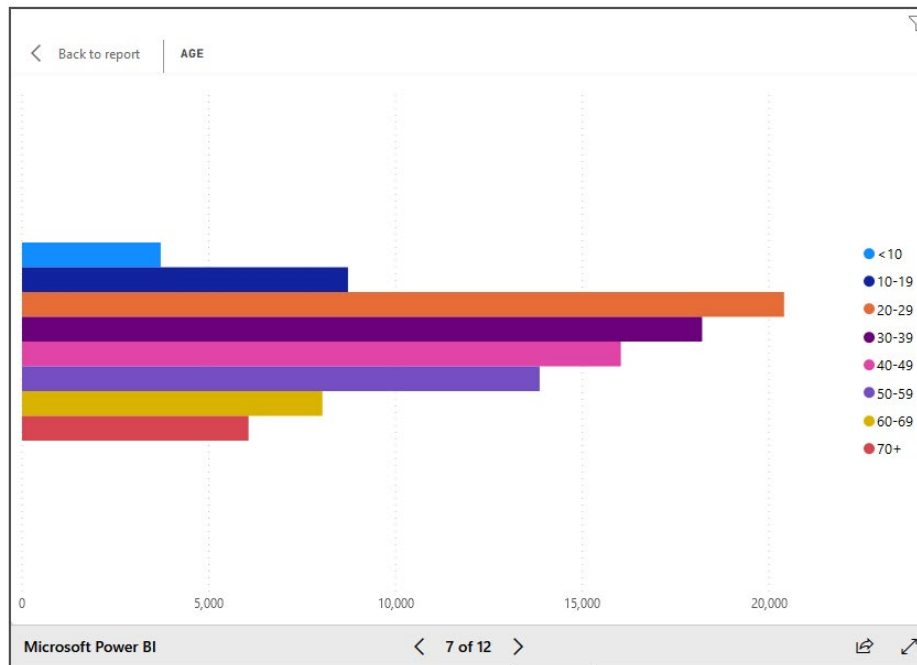

Total cases: 101,235

**eFigure E. Nevada COVID-19 Cases by Age (as of October 30, 2020)**

Source: Nevada Department of Health  
<https://nvhealthresponse.nv.gov>

**eTable F. New Mexico COVID-19 Cases by Age (as of 10/23/2020)**

| <b>Age</b> | <b>Number of Cases</b> |
|------------|------------------------|
| 0-9        | 2120                   |
| 10-19      | 4513                   |
| 20-29      | 7987                   |
| 30-39      | 7290                   |
| 40-49      | 6145                   |
| 50-59      | 5339                   |
| 60-69      | 3594                   |
| 70-79      | 1810                   |
| 80-89      | 975                    |
| 90+        | 347                    |

Total: 4012

Source: New Mexico Department of Health

<https://cvprovider.nmhealth.org/public-dashboard.html#>

**eTable G. North Dakota COVID-19 Cases by Age (as of October 23, 2020)**

| Age   | Total Cases |
|-------|-------------|
| 0-9   | 1549        |
| 10-19 | 4658        |
| 20-29 | 8814        |
| 30-39 | 5932        |
| 40-49 | 4486        |
| 50-59 | 4292        |
| 60-69 | 3490        |
| 70-79 | 1859        |
| 80+   | 1794        |
| Total | 35,080      |

Source: North Dakota Department of Health

<https://www.health.nd.gov/diseases-conditions/coronavirus/north-dakota-coronavirus-cases>

## eTable/Figure H. Oregon COVID-19 Cases by Age (as of October 30, 2020)

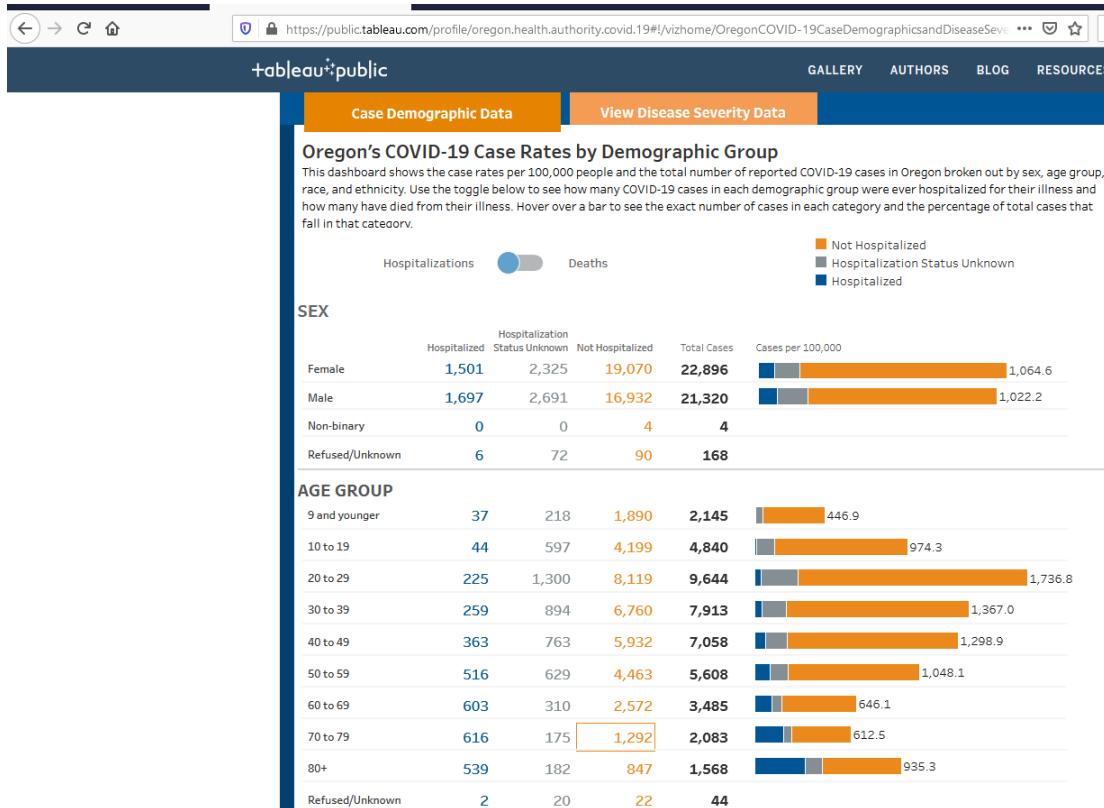

Source: Oregon Health Authority (OHA) and the OHA Public Health Division  
<https://public.tableau.com/app/profile/oregon.health.authority.covid.19/viz/OregonCOVID-19CaseDemographicsandDiseaseSeverityStatewide/DemographicData>

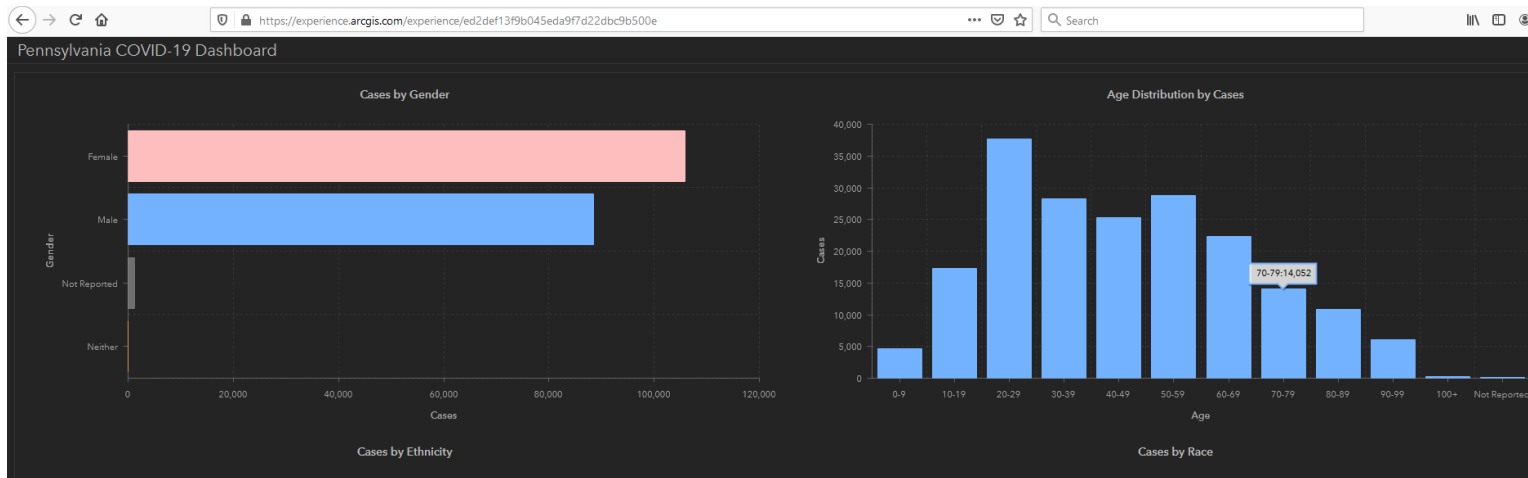

https://data.pa.gov/Health/COVID-19-Aggregate-Cases-Current-Daily-County-Health/j72v-r42c/data

opendata PA Commonwealth of Pennsylvania

Home Data Catalog governor.pa.gov COVID-19 Spatial Data Other

COVID-19 Aggregate Cases Current Daily County Health

Based on [COVID-19 Aggregate Cases Current Daily County Health](#)

This dataset contains aggregate COVID-19 case counts and rates by date of first report for all counties in Pennsylvania and for the state as a whole. Counts

| Jurisdiction | Date       | New Cases | 7-day Averag... | Cumulative c... | Population (...) | New Case Rate | 7-Day Averag... | Cumulative ... | County FIPS ... | Longitude  | Latitude  | Georeferenc...      |
|--------------|------------|-----------|-----------------|-----------------|------------------|---------------|-----------------|----------------|-----------------|------------|-----------|---------------------|
| Pennsylvania | 10/30/2020 | 2,691     | 2,226.3         | 209,822         | 12,801,989       | 21            | 17.4            | 1,639          | 42000           | -75.167756 | 39.346129 | POINT (-75.16775... |

Total cases 209,822.

# eFigure I. Pennsylvania COVID-19 Cases by Age (as of October 30, 2020)

Source: Pennsylvania Department of Health, <https://experience.arcgis.com/experience/ed2def13f9b045eda9f7d22dbc9b500e>

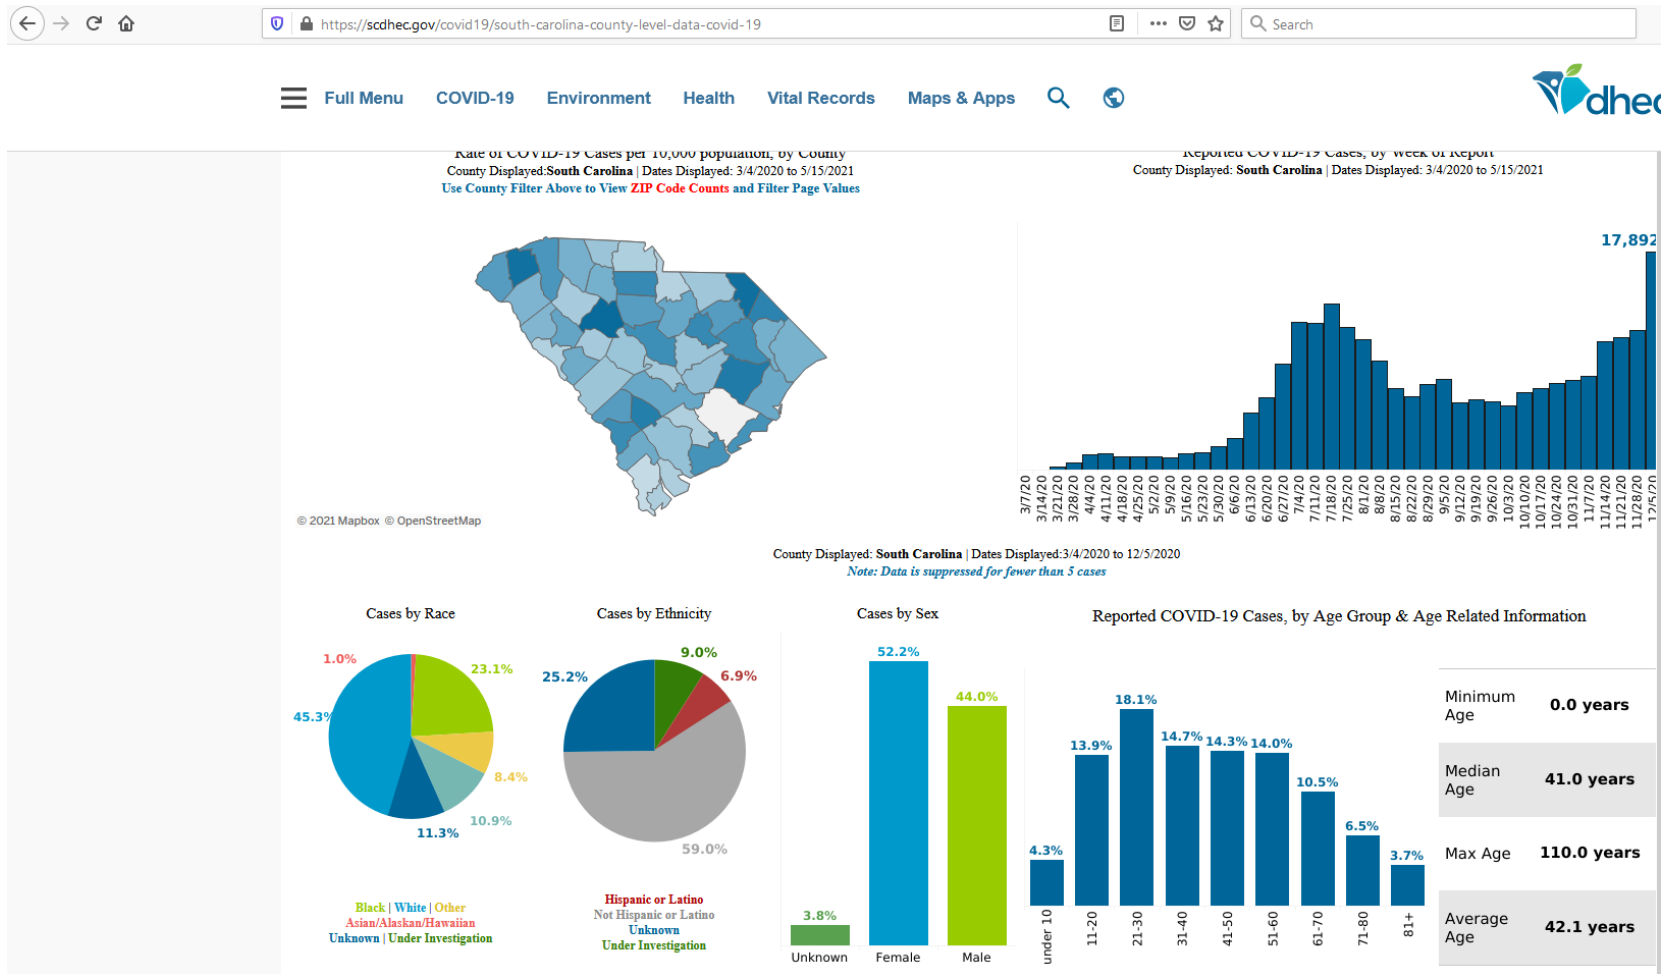

Total cases: 17,892

## eFigure J. South Carolina COVID-19 Cases by Age (as of Dec. 5, 2020)

Source: South Carolina Department of Health and Environmental Control

<https://scdhec.gov/covid19/south-carolina-county-level-data-covid-19>

<https://doh.sd.gov/news/coronavirus.aspx>

☰ ⋮ 🏠 ☆ 🔍 Search

Click the boxes below to explore the data.

- Active
- Recovered
- Deceased
- Ever Hospitalized
- Non-Hospitalized

**Cases:** Persons who meet the national surveillance case definition for COVID-19. According to the case definition, a confirmed case includes persons with a positive RT-PCR test and a probable case includes persons with a positive antigen test for the SARS-CoV-2 virus that causes COVID-19. A positive case moves from active to recovered status based on the CDC guidelines for removal from isolation.

**Hospitalized:** Refers to a person ever being hospitalized at some point during their COVID-19 infection. The number of persons Ever Hospitalized are based on cumulative numbers from the state's electronic disease surveillance system and reflect current and prior hospitalizations.

**Deaths:** SD-DOH does not report deaths until a certified death record has been filed with COVID-19 as a cause or contributing factor. By law, a death record must be filed within 5 days of the date of death.

### Cases by Age Range

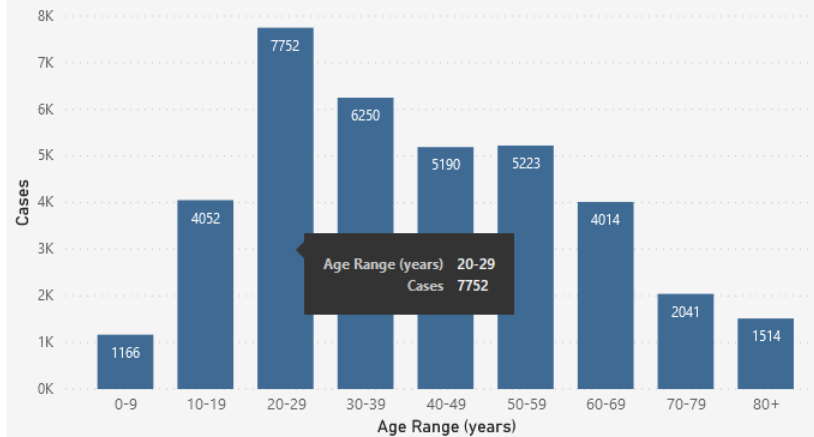

Total cases: 37,262



**eFigure K. South Dakota COVID-19 Cases by Age (as of Oct. 23, 2020)**

Source: South Dakota Department of health

<https://doh.sd.gov/news/coronavirus.aspx>

**eTable L. Tennessee COVID-19 Cases by Age (as of November 11, 2020)**

| Age     | Total Cases |
|---------|-------------|
| 0-10    | 14,363      |
| 11-20   | 38,925      |
| 21-30   | 57,829      |
| 31-40   | 46,794      |
| 41-50   | 43,426      |
| 51-60   | 39,243      |
| 61-70   | 27,287      |
| 71-80   | 16,316      |
| 81+     | 8,801       |
| Pending | 397         |

Total 293,381

Source: Tennessee Department of Health, "Age Dataset" in <https://www.tn.gov/health/cedep/ncov/data/downloadable-datasets.html>

## Percent of confirmed COVID-19 cases by age group

Updated: 10/23/2020 (Total: 190,478)

View cases by:

- Age group (years)
- Gender
- Race
- Ethnicity
- Region

Select case confirmation status:

- Confirmed
- Probable
- Confirmed and probable

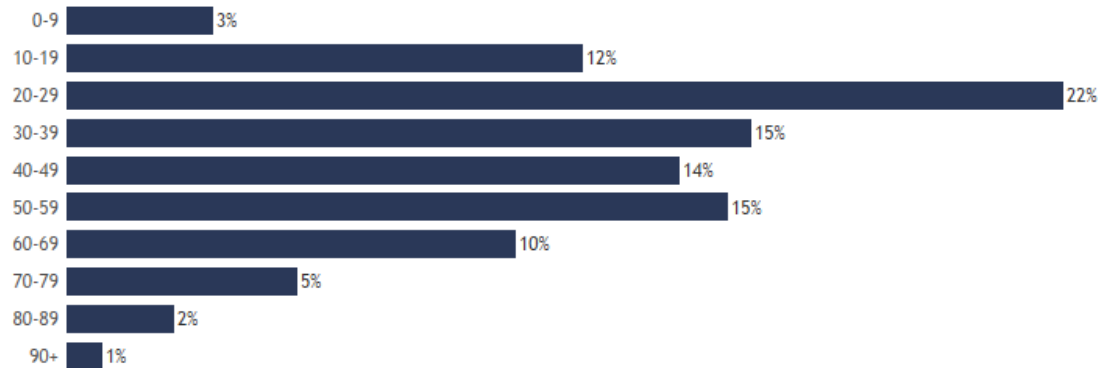

**eFigure M. Wisconsin COVID-19 Cases by Age (as of Oct. 23, 2020)**

Source: Wisconsin Department of Health Services

<https://www.dhs.wisconsin.gov/covid-19/cases.htm#by%20age>

## eTable/Figure N. Alabama COVID-19 Cases by Age (as of November 13, 2020)

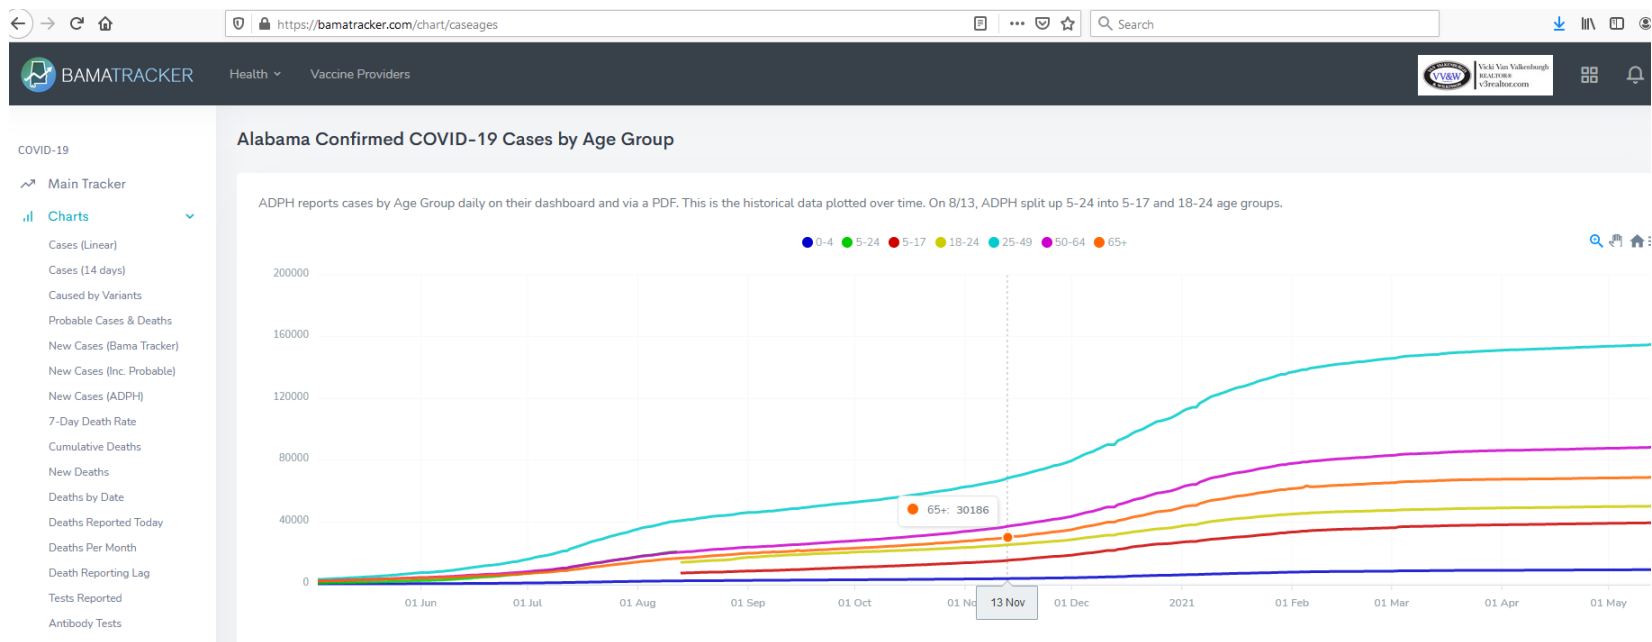

| Age   | Cumulative Cases |
|-------|------------------|
| 0-4   | 3,519            |
| 5-17  | 15,316           |
| 18-24 | 25,413           |
| 25-49 | 68,497           |
| 50-64 | 37,344           |
| 65+   | 30,186           |

Source: Alabama Department of Public Health COVID-19 Dashboard Hub  
<https://bamatracker.com/chart/caseages>

eTable/Figure O. Florida COVID-19 Cases by Age (through November 12, 2020)

## COVID-19: characteristics of 858,585 Florida resident cases

Data through Nov 12, 2020 verified as of Nov 13, 2020 at 09:25 AM

Data in this report are provisional and subject to change.

| Age group    | Cases          | Hospitalizations | Deaths        | Gender | Cases         |     |              |               |
|--------------|----------------|------------------|---------------|--------|---------------|-----|--------------|---------------|
| 0-4 years    | 14,429         | 2%               | 336           | 1%     | 0             | 0%  | Female       | 441,75        |
| 5-14 years   | 39,056         | 5%               | 310           | 1%     | 5             | 0%  | Male         | 412,38        |
| 15-24 years  | 140,515        | 16%              | 1,376         | 3%     | 32            | 0%  | Unknown      | 4,44          |
| 25-34 years  | 156,421        | 18%              | 2,870         | 6%     | 101           | 1%  | <b>Total</b> | <b>858,58</b> |
| 35-44 years  | 135,609        | 16%              | 4,282         | 8%     | 302           | 2%  |              |               |
| 45-54 years  | 133,416        | 16%              | 6,404         | 12%    | 714           | 4%  |              |               |
| 55-64 years  | 111,472        | 13%              | 9,001         | 17%    | 1,920         | 11% |              |               |
| 65-74 years  | 67,147         | 8%               | 10,310        | 20%    | 3,726         | 21% |              |               |
| 75-84 years  | 38,283         | 4%               | 9,751         | 19%    | 5,096         | 29% |              |               |
| 85+ years    | 21,217         | 2%               | 6,895         | 13%    | 5,549         | 32% |              |               |
| Unknown      | 1,020          | 0%               | 7             | 0%     | 0             | 0%  |              |               |
| <b>Total</b> | <b>858,585</b> |                  | <b>51,542</b> |        | <b>17,445</b> |     |              |               |

Source: Florida Department of Health, <https://floridahealthcovid19.gov/>

**eTable/Figure P. Oklahoma COVID-19 Cases by Age (as of Oct. 22, 2020)**

**DEMOGRAPHIC INFORMATION as of October 22, 2020**

|                  |            | Cases count (%) <sup>1</sup> |        | Deaths count (%) <sup>1</sup> |        | Cumulative Incidence Rate <sup>2</sup> | Cumulative Mortality Rate <sup>2</sup> |
|------------------|------------|------------------------------|--------|-------------------------------|--------|----------------------------------------|----------------------------------------|
| <b>Oklahoma</b>  |            | <b>112,483</b>               |        | <b>1221</b>                   |        | <b>2,852.7</b>                         | <b>31.0</b>                            |
| <b>Gender</b>    |            |                              |        |                               |        |                                        |                                        |
|                  | Male       | 53,835                       | (47.9) | 680                           | (55.7) | 2,756.5                                | 34.8                                   |
|                  | Female     | 58,648                       | (52.1) | 541                           | (44.3) | 2,947.1                                | 27.2                                   |
| <b>Age group</b> |            |                              |        |                               |        |                                        |                                        |
|                  | Under 1- 4 | 2,126                        | (1.9)  | 0                             | (0.0)  | 816.3                                  | 0.0                                    |
|                  | 5-14       | 6,392                        | (5.7)  | 1                             | (0.1)  | 1,188.3                                | 0.2                                    |
|                  | 15-24      | 22,499                       | (20.0) | 2                             | (0.2)  | 4,183.3                                | 0.4                                    |
|                  | 25-34      | 19,221                       | (17.1) | 11                            | (0.9)  | 3,538.4                                | 2.0                                    |
|                  | 35-44      | 17,855                       | (15.9) | 19                            | (1.6)  | 3,641.0                                | 3.9                                    |
|                  | 45-54      | 15,456                       | (13.7) | 56                            | (4.6)  | 3,357.7                                | 12.2                                   |
|                  | 55-64      | 13,080                       | (11.6) | 150                           | (12.3) | 2,650.8                                | 30.4                                   |
|                  | 65-74      | 8,698                        | (7.7)  | 324                           | (26.5) | 2,425.2                                | 90.3                                   |
|                  | 75-84      | 4,771                        | (4.2)  | 333                           | (27.3) | 2,541.7                                | 177.4                                  |
|                  | 85+        | 2,384                        | (2.1)  | 325                           | (26.6) | 3,257.0                                | 444.0                                  |
|                  | Unknown    | 1                            | (0.0)  |                               |        |                                        |                                        |

Source: Oklahoma State Department of Health

[https://coronavirus.health.ok.gov/sites/g/files/gmc786/f/2020.10.23\\_weekly\\_epi\\_report.pdf](https://coronavirus.health.ok.gov/sites/g/files/gmc786/f/2020.10.23_weekly_epi_report.pdf)

**eTable Q. Rhode Island COVID-19 Cases by Age (as of October 24, 2020)**

| Age   | Cumulative Cases |
|-------|------------------|
| 0-4   | 480              |
| 5-9   | 531              |
| 10-14 | 656              |
| 15-18 | 1174             |
| 19-24 | 3522             |
| 25-29 | 2655             |
| 30-39 | 4658             |
| 40-49 | 4125             |
| 50-59 | 4175             |
| 60-69 | 2880             |
| 70-79 | 1773             |
| 80+   | 2364             |

Total cases 28,993

Source: Rhode Island Department of Health (RIDOH) Salesforce COVID-19 Case Dataset  
<https://ri-department-of-health-covid-19-case-data-rihealth.hub.arcgis.com/#age>

**eTable R. Minnesota COVID-19 Cases by Age (as of Oct. 23, 2020)**

| <b>Age Group</b>       | <b>Number of Cases</b> |
|------------------------|------------------------|
| 0-4 years              | 2,536                  |
| 5-9 years              | 2,624                  |
| 10-14 years            | 3,988                  |
| 15-19 years            | 11,769                 |
| 20-24 years            | 16,429                 |
| 25-29 years            | 12,611                 |
| 30-34 years            | 11,466                 |
| 35-39 years            | 10,447                 |
| 40-44 years            | 9,371                  |
| 45-49 years            | 8,916                  |
| 50-54 years            | 8,893                  |
| 55-59 years            | 8,242                  |
| 60-64 years            | 6,536                  |
| 65-69 years            | 4,415                  |
| 70-74 years            | 3,393                  |
| 75-79 years            | 2,561                  |
| 80-84 years            | 2,066                  |
| 85-89 years            | 1,754                  |
| 90-94 years            | 1,209                  |
| 95-99 years            | 524                    |
| 100+ years             | 95                     |
| <b>Unknown/missing</b> | 18                     |

Total 129,863

Source: <https://www.health.state.mn.us/diseases/coronavirus/situation.html#ageg1>

**eTable S. Missouri COVID-19 Cases by Age (as of Oct. 23, 2020)**

| <b>Age</b> | <b>Missouri Number of Cases</b> |
|------------|---------------------------------|
| 0-9        | 3054                            |
| 10-19      | 13637                           |
| 20         | 3596                            |
| 21         | 3512                            |
| 22         | 2831                            |
| 23         | 2655                            |
| 24         | 2403                            |
| 25         | 2316                            |
| 26         | 2260                            |
| 27         | 2243                            |
| 28         | 2181                            |
| 29         | 2114                            |
| 30         | 2006                            |
| 31         | 1942                            |
| 32         | 1893                            |
| 33         | 1762                            |
| 34         | 1769                            |
| 35         | 1761                            |
| 36         | 1659                            |
| 37         | 1761                            |
| 38         | 1736                            |
| 39         | 1761                            |
| 40         | 1752                            |
| 41         | 1554                            |
| 42         | 1589                            |
| 43         | 1659                            |
| 44         | 1579                            |
| 45         | 1654                            |
| 46         | 1556                            |
| 47         | 1620                            |
| 48         | 1678                            |
| 49         | 1783                            |
| 50         | 1686                            |
| 51         | 1704                            |
| 52         | 1616                            |



|         |      |
|---------|------|
| 53      | 1619 |
| 54      | 1579 |
| 55      | 1655 |
| 56      | 1633 |
| 57      | 1677 |
| 58      | 1619 |
| 59      | 1608 |
| 60      | 1519 |
| 61      | 1477 |
| 62      | 1361 |
| 63      | 1394 |
| 64      | 1308 |
| 65      | 1188 |
| 66      | 1100 |
| 67      | 1028 |
| 68      | 1031 |
| 69      | 976  |
| 70      | 950  |
| 71      | 886  |
| 72      | 908  |
| 73      | 844  |
| 74      | 731  |
| 75      | 707  |
| 76      | 679  |
| 77      | 746  |
| 78      | 627  |
| 79      | 574  |
| 80-84   | 2410 |
| 85-89   | 1918 |
| 90+     | 1975 |
| Unknown | 289  |

Total cases: 120,298

Source: Missouri Department of Health and Senior Services

<https://health.mo.gov/living/healthcondiseases/communicable/novel-coronavirus/cases-by-age.php>

#### **eAppendix 4.** Demographic Data by Age and by State Websites

- (i) Alaska: <https://live.laborstats.alaska.gov/pop/>
- (ii) Colorado: Colorado State Demography Office, Colorado Department of Local Affairs, <https://demography.dola.colorado.gov/population/data/sya-regions/>
- (iii) Michigan: <https://censusreporter.org/profiles/04000US26-michigan/>
- (iv) Montana: <https://censusreporter.org/profiles/04000US30-montana/>
- (v) Nevada: <https://censusreporter.org/profiles/04000US32-nevada/>
- (vi) New Mexico: [https://censusreporter.org/data/table/?table=B01001&geo\\_ids=04000US35&primary\\_geo\\_id=04000US35](https://censusreporter.org/data/table/?table=B01001&geo_ids=04000US35&primary_geo_id=04000US35)
- (vii) North Dakota: <https://censusreporter.org/profiles/04000US38-north-dakota/>
- (viii) Oregon: <https://censusreporter.org/profiles/04000US41-oregon/>
- (ix) Pennsylvania: <https://censusreporter.org/profiles/04000US42-pennsylvania/>
- (x) South Carolina: <https://censusreporter.org/profiles/04000US45-south-carolina/>
- (xi) South Dakota: <https://www.sdstate.edu/sociology-rural-studies/census-data-center/population-change>
- (xii) Tennessee: <https://www.tn.gov/content/dam/tn/health/documents/population/TN-Population-by-AgeGrp-Sex-Race-Ethnicity-2019.pdf>
- (xiii) Wisconsin: <https://censusreporter.org/profiles/04000US55-wisconsin/>
- (xiv) Alabama: <https://censusreporter.org/profiles/04000US01-alabama/>
- (xv) Florida: [http://edr.state.fl.us/Content/populationdemographics/data/Pop\\_Census\\_Day.pdf](http://edr.state.fl.us/Content/populationdemographics/data/Pop_Census_Day.pdf)
- (xvi) Oklahoma: <https://censusreporter.org/profiles/04000US40-oklahoma/>
- (xvii) Rhode Island: <https://censusreporter.org/profiles/04000US44-rhode-island/>
- (xviii) Minnesota: <https://censusreporter.org/profiles/04000US27-minnesota/>
- (xix) Missouri: <https://healthapps.dhss.mo.gov/MoPhims/QueryBuilder?qbc=PNM&q=1&m=1>
